# Supplementary material for: Resource use and the impacts of fisheries on two sympatric sea snake species on the west coast of India
Source: Springer Nature journal article supplement (doi:10.1007/s00227-021-03956-2), 2021-08-21
Supplement: MOESM1 [file 227_2021_3956_MOESM1_ESM.pdf]

## **Resource use and the impacts of fisheries on two sympatric sea snake species on the West Coast of India.**

Shawn Dsouza<sup>1,2\*</sup>, Chetan Rao<sup>1</sup>, Muralidharan M<sup>1</sup> and Kartik Shanker<sup>1,2</sup>

### **Affiliations:**

<sup>1</sup>Dakshin Foundation, Bangalore, India.

<sup>2</sup>Center for Ecological Sciences, Indian Institute of Science, Bangalore, India.

\*Corresponding author

Email: shawn27.dsouza@gmail.com

### **Electronic Supplementary Materials**

## Supplementary materials A

**Table A1:** Linear models summarising the effect of fishing intensity on Carbon and Nitrogen isotope ratios of plasma and scale in *Hydrophis curtus* and *H. schistosus*

| Species                     | Tissue type | Isotope         | Parameter         | Coefficient | Standard Error | T      | p     | $r_{adj}^2$ |
|-----------------------------|-------------|-----------------|-------------------|-------------|----------------|--------|-------|-------------|
| <i>Hydrophis curtus</i>     | Plasma      | $\delta N^{15}$ | Intercept         | 13.866      | 0.234          |        |       |             |
|                             |             |                 | Fishing intensity | -0.003      | 0.003          | -0.835 | 0.418 | -0.021      |
|                             |             | $\delta C^{13}$ | Intercept         | -15.665     | 0.404          |        |       |             |
|                             |             |                 | Fishing intensity | -0.017      | 0.006          | -3.149 | 0.007 | 0.373       |
|                             | Scales      | $\delta N^{15}$ | Intercept         | 14.331      | 0.295          |        |       |             |
|                             |             |                 | Fishing intensity | 0.000       | 0.003          | -0.018 | 0.986 | -0.048      |
|                             |             | $\delta C^{13}$ | Intercept         | -15.010     | 0.324          |        |       |             |
|                             |             |                 | Fishing intensity | 0.003       | 0.004          | 0.958  | 0.349 | -0.004      |
| <i>Hydrophis schistosus</i> | Plasma      | $\delta N^{15}$ | Intercept         | 14.684      | 0.260          |        |       |             |
|                             |             |                 | Fishing intensity | 0.001       | 0.004          | 0.195  | 0.846 | -0.025      |
|                             |             | $\delta C^{13}$ | Intercept         | -16.577     | 0.256          |        |       |             |
|                             |             |                 | Fishing intensity | -0.001      | 0.004          | -0.294 | 0.770 | -0.024      |
|                             | Scales      | $\delta N^{15}$ | Intercept         | 14.864      | 0.363          |        |       |             |
|                             |             |                 | Fishing intensity | 0.000       | 0.006          | -0.075 | 0.940 | -0.029      |
|                             |             | $\delta C^{13}$ | Intercept         | -14.079     | 0.377          |        |       |             |
|                             |             |                 | Fishing intensity | -0.009      | 0.006          | -1.347 | 0.187 | 0.023       |

Supplementary Materials B

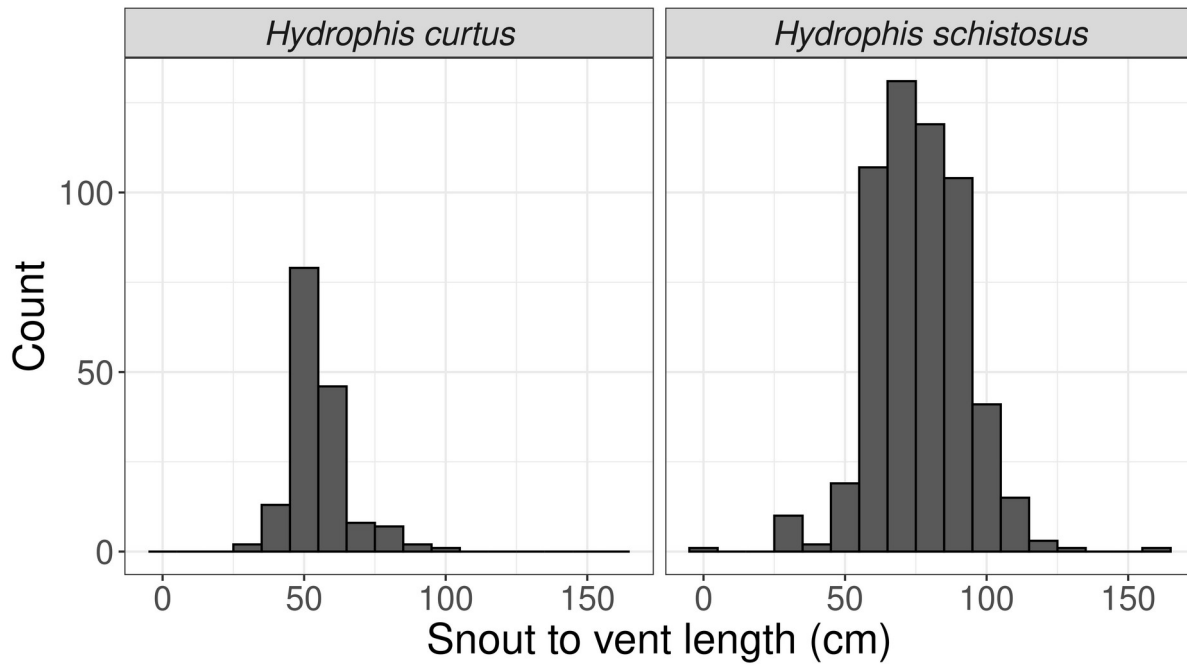

Fig B1: Snout to vent length (cm) distribution of sampled sea snakes.

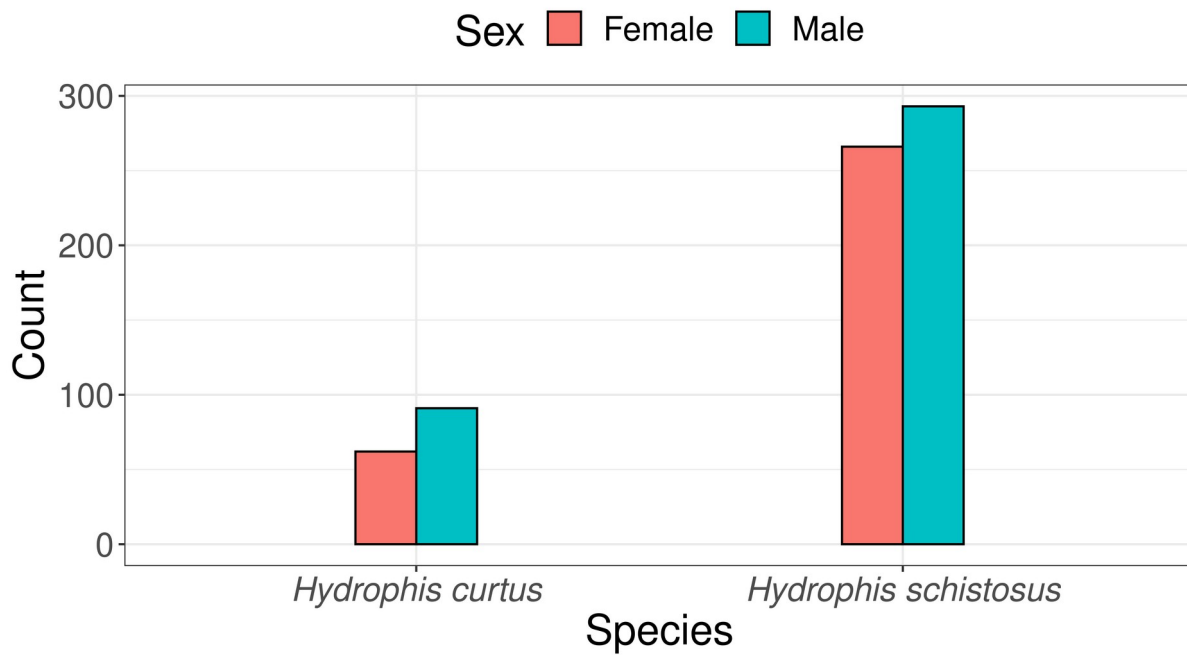

Fig B2: Distribution of males and females among sampled sea snake species.

### Supplementary Materials C

We compared prey preference and overlap across sexes in *Hydrophis curtus* and *H. schistosus*. Sample sizes (number of prey specimens) were too small for further analysis.

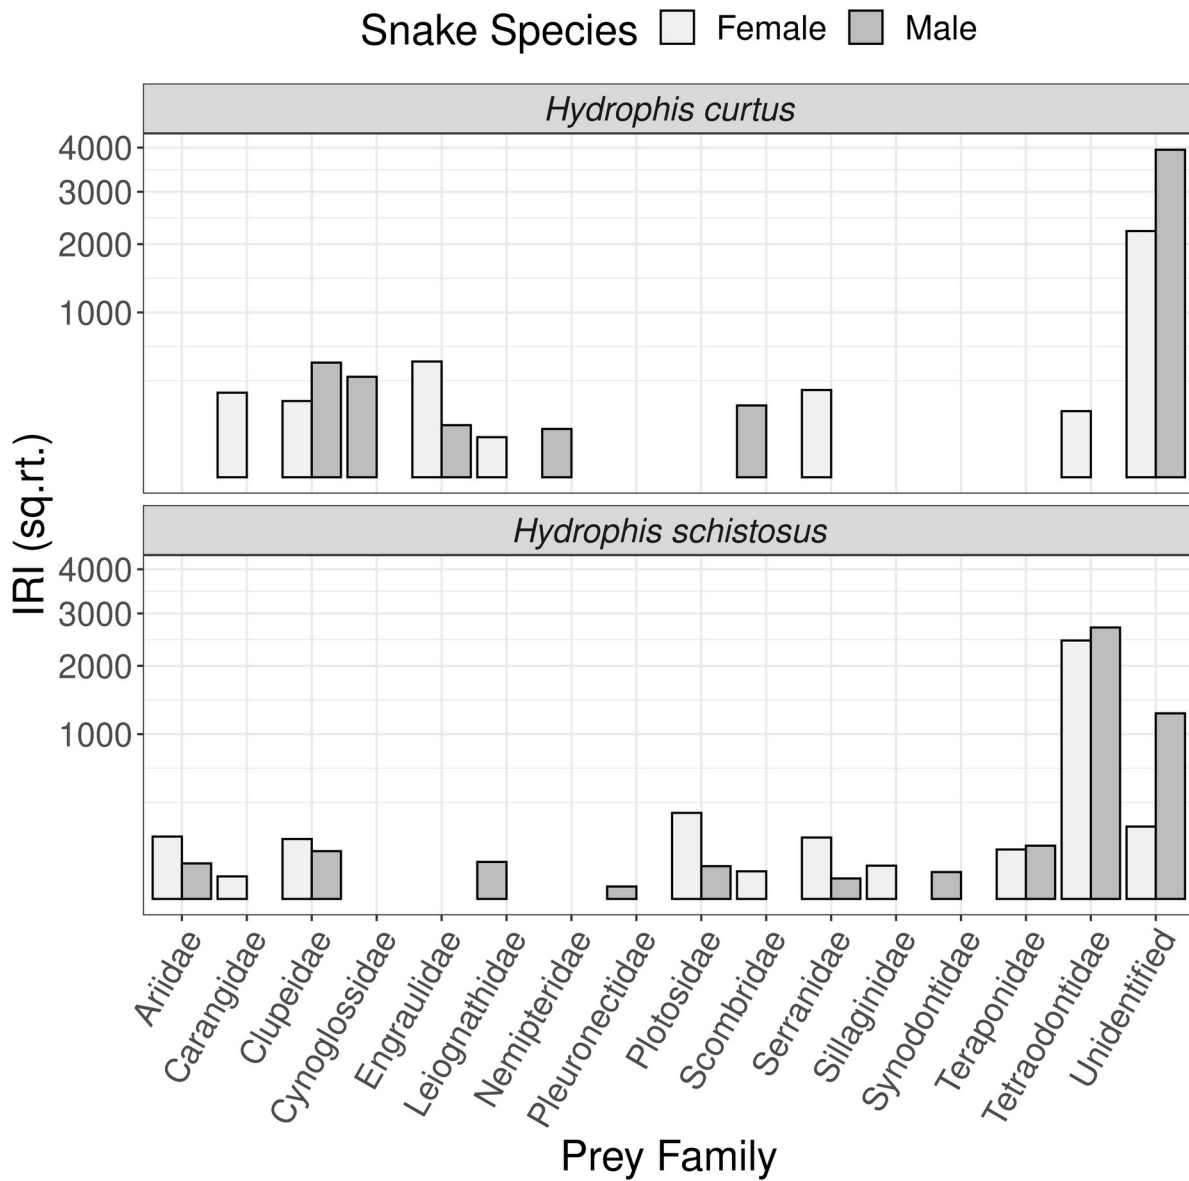

**Fig C1:** Preferences among males and females of *Hydrophis curtus* and *H. schistosus*.

**Table C1:** Richness of prey species and prey families taken by males and females of sampled sea snake species.

| <b>Snake Species</b>        | <b>Sex</b> | <b>Prey Species</b> | <b>Prey Families</b> | <b>Overlap</b> |
|-----------------------------|------------|---------------------|----------------------|----------------|
| <i>Hydrophis curtus</i>     | Female     | 6                   | 6                    | 2              |
| <i>Hydrophis curtus</i>     | Male       | 4                   | 5                    |                |
| <i>Hydrophis schistosus</i> | Female     | 12                  | 9                    | 6              |
| <i>Hydrophis schistosus</i> | Male       | 10                  | 9                    |                |

## Supplementary Materials D

A comparison of gut content data across locations using data collated by Sherratt et al. (2018) from Malaysia (Voris and Voris, 1983) and Australia (Fry et al., 2001).

**Table D1:** Richness of prey families found in sea snake guts in current and previous studies.

| Snake species               | Location  | Reference               | Richness | Sample size |
|-----------------------------|-----------|-------------------------|----------|-------------|
|                             | Australia | Fry et al. (2001)       | 18       | 118         |
| <i>Hydrophis curtus</i>     | Malaysia  | Voris and Voris (1983)  | 33       | 130         |
|                             | India     | Dsouza et al. (Current) | 9        | 35          |
| <i>Hydrophis schistosus</i> | Malaysia  | Voris and Voris (1983)  | 9        | 172         |
|                             | India     | Dsouza et al. (Current) | 12       | 89          |

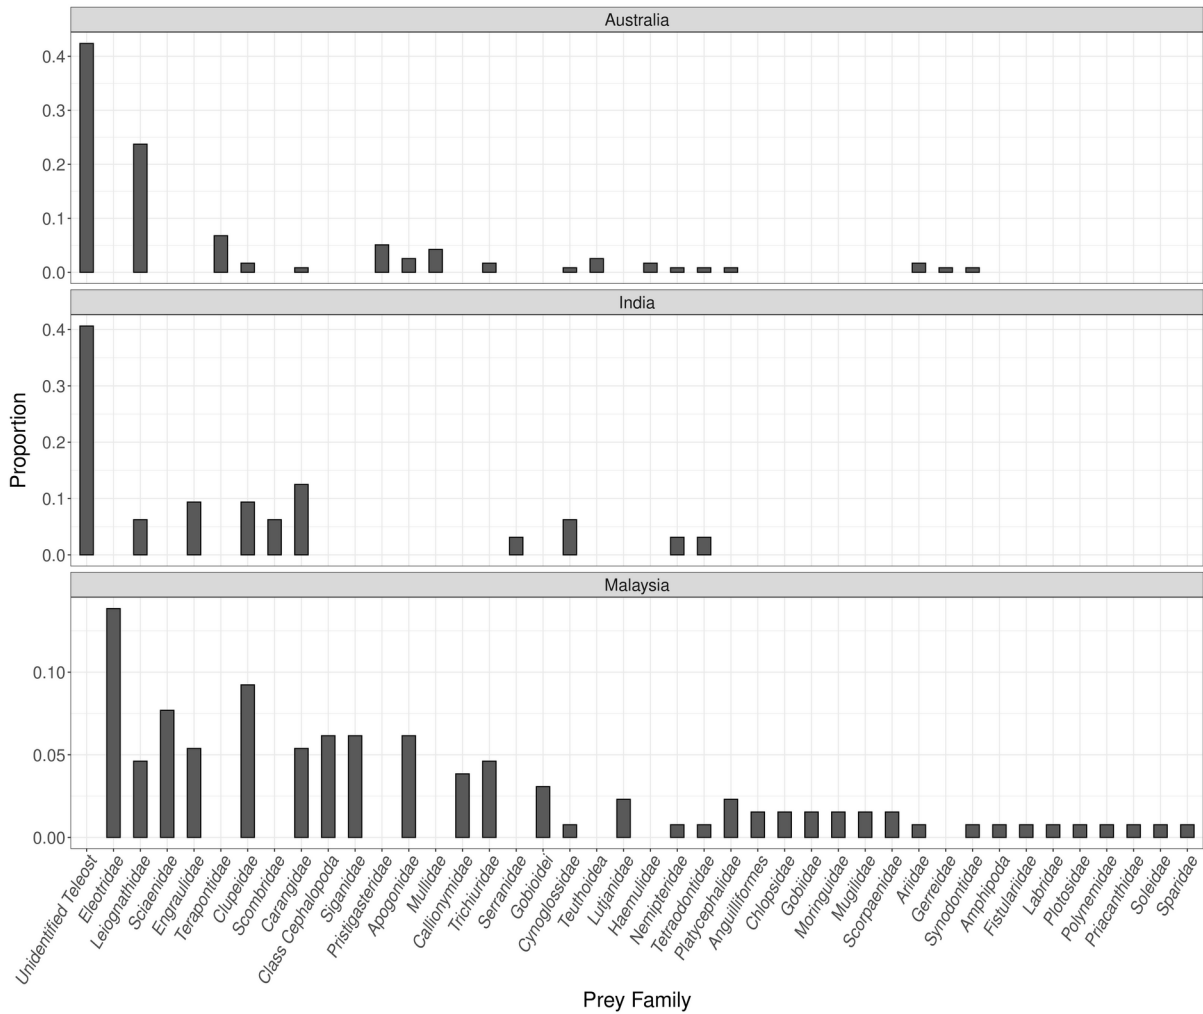

**Fig D1:** Relative proportions of prey families in *Hydrophis curtus* gut content as reported in the current study (India), Fry et al. (2001, Australia) and Voris and Voris (1983, Malaysia).

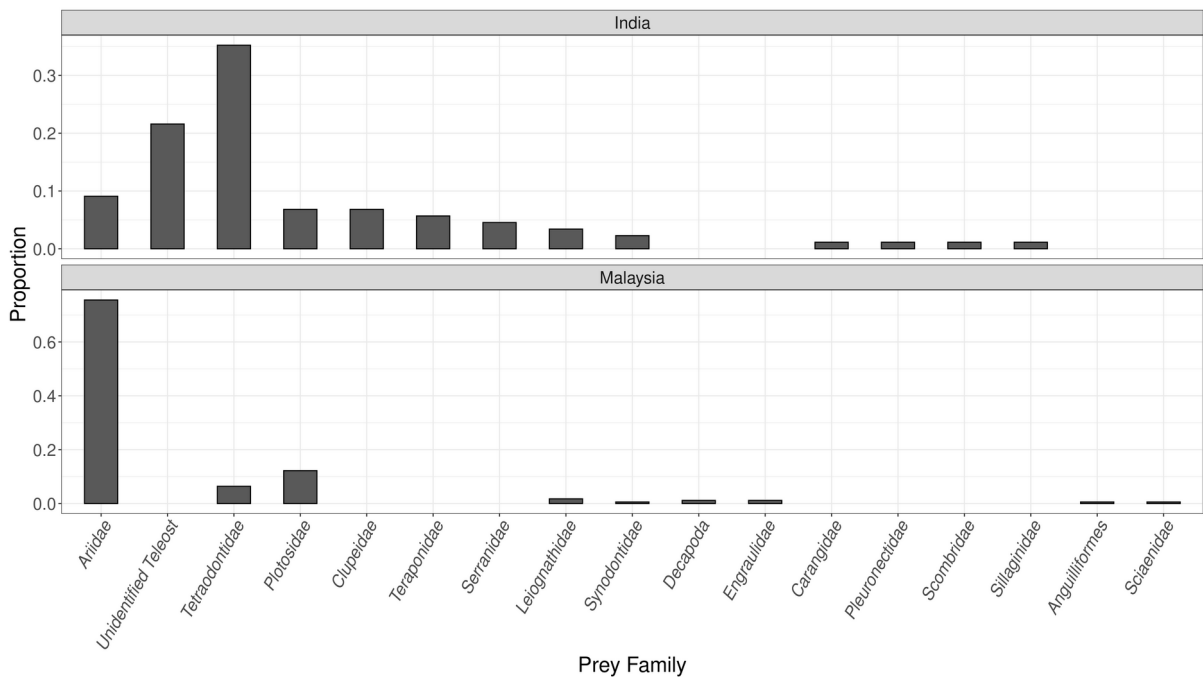

**Fig D2:** Relative proportions of prey families in *Hydrophis schistosus* gut content as reported in the current study (India) and Voris and Voris (1983, Malaysia).
